# Supplementary material
Source: PubMed Central journal article supplement (PMC8294470)
Supplement: NIHMS1702689-supplement-Supplemental_Tables.pdf [file NIHMS1702689-supplement-Supplemental_Tables.pdf]

Supplemental Table 1  
CyTOF antibody panel

| Catalog Number | Metal Tag | Marker         | Clone     | Dilution | Source   |
|----------------|-----------|----------------|-----------|----------|----------|
| 3141019B       | 141Pr     | CD3            | UCHT1     | 1:200    | Fluidigm |
| 3142001B       | 142Nd     | CD19           | HIB19     | 1:300    | Fluidigm |
| 3144019B       | 144Nd     | CD15 (SSEA-1)  | W6D3      | 1:400    | Fluidigm |
| 3145010B       | 145Nd     | CD163          | GHI/61    | 1:100    | Fluidigm |
| 3146006B       | 146Nd     | CD64           | 10.1      | 1:100    | Fluidigm |
| 3148004B       | 148Nd     | CD16           | 3G8       | 1:400    | Fluidigm |
| 3151002B       | 151Eu     | CD107a (LAMP1) | H4A3      | 1:100    | Fluidigm |
| 3152011B       | 152Sm     | CD66b          | 80H3      | 1:200    | Fluidigm |
| 3153023B       | 153Eu     | CD192 (CCR2)   | K036C2    | 1:200    | Fluidigm |
| 3154016B       | 154Sm     | TIGIT          | MBSA43    | 1:100    | Fluidigm |
| 3155009B       | 155Gd     | CD279 (PD-1)   | EH12.2H7  | 1:100    | Fluidigm |
| 3156026B       | 156Gd     | CD274 (PD-L1)  | 29E.2A3   | 1:100    | Fluidigm |
| 3162015B       | 162Dy     | CD8a           | RPA-T8    | 1:200    | Fluidigm |
| 3163023B       | 163Dy     | CD33           | WM53      | 1:200    | Fluidigm |
| 3165011B       | 165Ho     | CD45RO         | UCHL1     | 1:200    | Fluidigm |
| 3166012B       | 166Er     | CD34           | 581       | 1:100    | Fluidigm |
| 201167A        | 167Er     | CD45RA         | HI100     | 1:100    | Fluidigm |
| 3168008B       | 168Er     | CD206 (MMR)    | 15-2      | 1:100    | Fluidigm |
| 3169003B       | 169Tm     | CD25 (IL-2R)   | 2A3       | 1:100    | Fluidigm |
| 3170005B       | 170Er     | CD152 (CTLA-4) | 14D3      | 1:100    | Fluidigm |
| 3171011B       | 171Yb     | CD68           | Y1/82A    | 1:100    | Fluidigm |
| 3172014B       | 172Yb     | CD273 (PD-L2)  | 24F.10C12 | 1:100    | Fluidigm |
| 3173005B       | 173Yb     | HLA-DR         | L243      | 1:400    | Fluidigm |
| 3175015B       | 175Lu     | CD14           | M5E2      | 1:100    | Fluidigm |
| 3176010B       | 176Yb     | CD4            | RPA-T4    | 1:100    | Fluidigm |
| 3209003B       | 209Bi     | CD11b (Mac-1)  | ICRF44    | 1:200    | Fluidigm |
| 3089003B       | 89Y       | CD45           | HI30      | 1:200    | Fluidigm |
| 3150030B       | 150Nd     | LAG3           | 11C3C65   | 1:100    | Fluidigm |
| 3160020B       | 160Gd     | CD23           | EBVCS-5   | 1:100    | Fluidigm |
| 3149021B       | 149Sm     | CD56 (NCAM)    | NCAM16.2  | 1:100    | Fluidigm |



Supplemental Table 3A

| <b>PRIMARY ANTIBODY</b> | <b>COMPANY-CATALOGUE NUMBER</b> | <b>CONCENTRATION</b> | <b>SECONDARY ANTIBODY</b> | <b>COMPANY-CATALOGUE NUMBER</b> | <b>OPAL TSA™ FLUOROPHORE</b> |
|-------------------------|---------------------------------|----------------------|---------------------------|---------------------------------|------------------------------|
| CD8                     | SpringBio-M5390                 | 1:400                | Opal Polymer®             | ARH1A01EA                       | 570                          |
| CD3                     | Dako-A0452                      | 1:400                | Opal Polymer®             | ARH1A01EA                       | 520                          |
| CD163                   | Leica-NCL-L-CD163               | 1:400                | Opal Polymer®             | ARH1A01EA                       | 650                          |
| PD-L1                   | CST-13684                       | 1:200                | Opal Polymer®             | ARH1A01EA                       | 540                          |
| Pancytokeratin          | Dako-M3515                      | 1:500                | Opal Polymer®             | ARH1A01EA                       | 690                          |
| FOXP3                   | CST-12653                       | 1:400                | Opal Polymer®             | ARH1A01EA                       | 620                          |

Supplemental Table 3B

| <b>COMPLEX PHENOTYPES FOR CHRONIC PANCREATITIS</b> | <b>BASIC PHENOTYPE (inForm<sup>®</sup>)</b> | <b>MEAN FLUORESCENT INTENSITY (MFI)</b> | <b>CELL SEGMENT OF MFI</b> | <b>POSITIVE OR NEGATIVE MFI</b> |
|----------------------------------------------------|---------------------------------------------|-----------------------------------------|----------------------------|---------------------------------|
| Tumor epithelial cell (TC)                         | Epithelial cell                             | N/A                                     | N/A                        | N/A                             |
| PD-L1+ TC                                          | Epithelial cell                             | PD-L1 (5 mfi)                           | Membrane                   | Positive                        |
| PD-L1- TC                                          | Epithelial cell                             | PD-L1 (5 mfi)                           | Membrane                   | Negative                        |
| Antigen presenting cell (APC)                      | APC                                         | N/A                                     | N/A                        | N/A                             |
| PD-L1+ APC                                         | APC                                         | PD-L1 (5 mfi)                           | Membrane                   | Positive                        |
| PD-L1- APC                                         | APC                                         | PD-L1 (5 mfi)                           | Membrane                   | Negative                        |
| T <sub>regulatory</sub> cell (T <sub>reg</sub> )   | Tcell                                       | FOXP3 (4.75 mfi)<br>CD8 (3 mfi)         | Nucleus<br>Cytoplasm       | Positive<br>Negative            |
| Cytotoxic Tcell (CTL)                              | Tcell                                       | CD8 (3 mfi)                             | Cytoplasm                  | Positive                        |
| T <sub>helper</sub> cell (Th)                      | Tcell                                       | CD8 (3 mfi)<br>FOXP3 (4.75 mfi)         | Cytoplasm<br>Nucleus       | Negative<br>Negative            |

Supplemental Table 3C

| <b>COMPLEX PHENOTYPES FOR PDASAMPLES</b>         | <b>BASIC PHENOTYPE (inForm<sup>®</sup>)</b> | <b>MEAN FLUORESCENT INTENSITY (MFI)</b> | <b>CELL SEGMENT OF MFI</b> | <b>POSITIVE OR NEGATIVE MFI</b> |
|--------------------------------------------------|---------------------------------------------|-----------------------------------------|----------------------------|---------------------------------|
| Tumor epithelial cell (TC)                       | Epithelial cell                             | N/A                                     | N/A                        | N/A                             |
| PD-L1+ TC                                        | Epithelial cell                             | PD-L1 (2 mfi)                           | Membrane                   | Positive                        |
| PD-L1- TC                                        | Epithelial cell                             | PD-L1 (2 mfi)                           | Membrane                   | Negative                        |
| Antigen presenting cell (APC)                    | APC                                         | N/A                                     | N/A                        | N/A                             |
| PD-L1+ APC                                       | APC                                         | PD-L1 (2 mfi)                           | Membrane                   | Positive                        |
| PD-L1- APC                                       | APC                                         | PD-L1 (2 mfi)                           | Membrane                   | Negative                        |
| T <sub>regulatory</sub> cell (T <sub>reg</sub> ) | Tcell                                       | FOXP3 (2 mfi)<br>CD8 (3 mfi)            | Nucleus<br>Cytoplasm       | Positive<br>Negative            |
| Cytotoxic Tcell (CTL)                            | Tcell                                       | CD8 (3 mfi)                             | Cytoplasm                  | Positive                        |
| T <sub>helper</sub> cell (Th)                    | Tcell                                       | CD8 (3 mfi)<br>FOXP3 (2 mfi)            | Cytoplasm<br>Nucleus       | Negative<br>Negative            |

Supplemental Table 4

| <b>Marker</b>                                        | <b>Clone</b> | <b>Dilution</b> | <b>Source</b>             | <b>Catalog Number</b> |
|------------------------------------------------------|--------------|-----------------|---------------------------|-----------------------|
| PVR/CD155                                            | D8A5G        | 1:100           | Cell Signaling Technology | Cat# 81254S           |
| Recombinant Anti-TIGIT antibody                      | BLR047F      | 1:100           | Abcam                     | Cat# ab243903         |
| CD8 $\alpha$                                         | C8/144B      | 1:100           | Cell Signaling Technology | Cat# 70306S           |
| Anti-human CD163                                     | 10D6         | 1:100           | Novus Biologicals         | Cat# NB110-59935SS    |
| Pan Cytokeratin Monoclonal Antibody, Alexa Fluor 488 | AE1/AE3      | 1:250           | Thermo Fisher Scientific  | Cat# 53-9003-82       |
| FoxP3                                                | D6O8R        | 1:100           | Cell Signaling Technology | Cat# 12653S           |
| Vimentin XP $\text{\textcircled{R}}$                 | D21H3        | 1:100           | Cell Signaling Technology | Cat# 5741S            |
| VE- Cadherin/CD144                                   | 123413       | 1:250           | R&D                       | #MAB9381              |

Supplemental Table 5

Literature Supported Receptor Ligand Pairs

| <b>Ligand.ApprovedSymbol</b> | <b>Receptor.ApprovedSymbol</b> |
|------------------------------|--------------------------------|
| <b>APOB</b>                  | LDLR                           |
| <b>APOE</b>                  | LDLR                           |
| <b>APOE</b>                  | LRP5                           |
| <b>APOE</b>                  | LRP8                           |
| <b>APOE</b>                  | SORL1                          |
| <b>APOE</b>                  | VLDLR                          |
| <b>CCL11</b>                 | ACKR2                          |
| <b>CCL11</b>                 | CCR2                           |
| <b>CCL11</b>                 | CCR3                           |
| <b>CCL11</b>                 | CCR5                           |
| <b>CCL11</b>                 | CXCR3                          |
| <b>CCL13</b>                 | ACKR2                          |
| <b>CCL13</b>                 | CCR1                           |
| <b>CCL13</b>                 | CCR2                           |
| <b>CCL13</b>                 | CCR3                           |
| <b>CCL13</b>                 | CCR5                           |
| <b>CCL13</b>                 | CXCR3                          |
| <b>CCL14</b>                 | ACKR2                          |
| <b>CCL14</b>                 | CCR1                           |
| <b>CCL14</b>                 | CCR5                           |
| <b>CCL15</b>                 | CCR1                           |
| <b>CCL15</b>                 | CCR3                           |
| <b>CCL16</b>                 | CCR1                           |
| <b>CCL16</b>                 | CCR2                           |
| <b>CCL16</b>                 | CCR5                           |
| <b>CCL16</b>                 | HRH4                           |
| <b>CCL17</b>                 | CCR4                           |
| <b>CCL17</b>                 | CCR8                           |
| <b>CCL19</b>                 | ACKR4                          |

|              |       |
|--------------|-------|
| <b>CCL19</b> | CCR7  |
| <b>CCL19</b> | CCRL2 |
| <b>CCL19</b> | CXCR3 |
| <b>CCL1</b>  | CCR8  |
| <b>CCL20</b> | CCR6  |
| <b>CCL20</b> | CXCR3 |
| <b>CCL21</b> | ACKR4 |
| <b>CCL21</b> | CCR7  |
| <b>CCL21</b> | CXCR3 |
| <b>CCL22</b> | CCR4  |
| <b>CCL23</b> | CCR1  |
| <b>CCL24</b> | CCR2  |
| <b>CCL24</b> | CCR3  |
| <b>CCL25</b> | ACKR4 |
| <b>CCL25</b> | CCR9  |
| <b>CCL26</b> | CCR2  |
| <b>CCL26</b> | CCR3  |
| <b>CCL27</b> | CCR10 |
| <b>CCL28</b> | CCR10 |
| <b>CCL28</b> | CCR3  |
| <b>CCL2</b>  | ACKR2 |
| <b>CCL2</b>  | CCR1  |
| <b>CCL2</b>  | CCR2  |
| <b>CCL2</b>  | CCR3  |
| <b>CCL2</b>  | CCR4  |
| <b>CCL2</b>  | CCR5  |
| <b>CCL2</b>  | DARC  |
| <b>CCL3</b>  | CCR1  |
| <b>CCL3</b>  | CCR5  |
| <b>CCL4</b>  | ACKR2 |
| <b>CCL4</b>  | CCR1  |
| <b>CCL4</b>  | CCR5  |



|               |        |
|---------------|--------|
| <b>CCL4</b>   | CCR8   |
| <b>CCL5</b>   | ACKR2  |
| <b>CCL5</b>   | CCR1   |
| <b>CCL5</b>   | CCR3   |
| <b>CCL5</b>   | CCR4   |
| <b>CCL5</b>   | CCR5   |
| <b>CCL5</b>   | CXCR3  |
| <b>CCL5</b>   | DARC   |
| <b>CCL5</b>   | GPR75  |
| <b>CCL7</b>   | ACKR2  |
| <b>CCL7</b>   | CCR1   |
| <b>CCL7</b>   | CCR2   |
| <b>CCL7</b>   | CCR3   |
| <b>CCL7</b>   | CCR5   |
| <b>CCL7</b>   | CXCR3  |
| <b>CCL8</b>   | ACKR2  |
| <b>CCL8</b>   | CCR1   |
| <b>CCL8</b>   | CCR2   |
| <b>CCL8</b>   | CCR3   |
| <b>CCL8</b>   | CCR5   |
| <b>CD24</b>   | SELP   |
| <b>CD34</b>   | SELL   |
| <b>CD40LG</b> | CD40   |
| <b>CD55</b>   | CD97   |
| <b>CD70</b>   | CD27   |
| <b>CX3CL1</b> | CX3CR1 |
| <b>CXCL10</b> | CCR3   |
| <b>CXCL10</b> | CXCR3  |
| <b>CXCL11</b> | ACKR3  |
| <b>CXCL11</b> | CCR3   |
| <b>CXCL11</b> | CXCR3  |
| <b>CXCL12</b> | ACKR3  |

|               |         |
|---------------|---------|
| <b>CXCL12</b> | CXCR3   |
| <b>CXCL12</b> | CXCR4   |
| <b>CXCL13</b> | CXCR5   |
| <b>CXCL16</b> | CXCR6   |
| <b>CXCL1</b>  | CXCR1   |
| <b>CXCL1</b>  | CXCR2   |
| <b>CXCL1</b>  | DARC    |
| <b>CXCL2</b>  | CXCR1   |
| <b>CXCL2</b>  | CXCR2   |
| <b>CXCL2</b>  | XCR1    |
| <b>CXCL3</b>  | CXCR1   |
| <b>CXCL3</b>  | CXCR2   |
| <b>CXCL5</b>  | CXCR1   |
| <b>CXCL5</b>  | CXCR2   |
| <b>CXCL6</b>  | CXCR1   |
| <b>CXCL6</b>  | CXCR2   |
| <b>CXCL9</b>  | CCR3    |
| <b>CXCL9</b>  | CXCR3   |
| <b>GZMB</b>   | IGF2R   |
| <b>HLA-A</b>  | KIR3DL2 |
| <b>HLA-B</b>  | KIR3DL1 |
| <b>HLA-C</b>  | KIR2DL1 |
| <b>HLA-C</b>  | KIR2DL3 |
| <b>HLA-C</b>  | KIR2DS4 |
| <b>HLA-E</b>  | KLRC1   |
| <b>HLA-E</b>  | KLRC2   |
| <b>HLA-E</b>  | KLRD1   |
| <b>HLA-G</b>  | KIR2DL4 |
| <b>HLA-G</b>  | KLRC1   |
| <b>HLA-G</b>  | KLRD1   |
| <b>HLA-G</b>  | LILRB1  |
| <b>IFNG</b>   | IFNGR1  |

|              |          |
|--------------|----------|
| <b>IFNG</b>  | IFNGR2   |
| <b>IL10</b>  | IL10RA   |
| <b>IL10</b>  | IL10RB   |
| <b>IL11</b>  | IL11RA   |
| <b>IL11</b>  | IL6ST    |
| <b>IL12A</b> | IL12RB1  |
| <b>IL12A</b> | IL12RB2  |
| <b>IL12B</b> | IL12RB1  |
| <b>IL12B</b> | IL12RB2  |
| <b>IL13</b>  | IL13RA1  |
| <b>IL13</b>  | IL13RA2  |
| <b>IL13</b>  | IL2RG    |
| <b>IL13</b>  | IL4R     |
| <b>IL15</b>  | IL15RA   |
| <b>IL15</b>  | IL2RB    |
| <b>IL15</b>  | IL2RG    |
| <b>IL16</b>  | CD4      |
| <b>IL17A</b> | IL17RA   |
| <b>IL17B</b> | IL17RB   |
| <b>IL18</b>  | IL18R1   |
| <b>IL18</b>  | IL18RAP  |
| <b>IL18</b>  | IL1RAPL1 |
| <b>IL19</b>  | IL20RA   |
| <b>IL19</b>  | IL20RB   |
| <b>IL1A</b>  | IL1R1    |
| <b>IL1A</b>  | IL1R2    |
| <b>IL1B</b>  | IL1R1    |
| <b>IL1B</b>  | IL1R2    |
| <b>IL1B</b>  | IL1RAP   |
| <b>IL1RN</b> | IL1R1    |
| <b>IL1RN</b> | IL1R2    |
| <b>IL20</b>  | IL20RA   |

|              |         |
|--------------|---------|
| <b>IL20</b>  | IL20RB  |
| <b>IL20</b>  | IL22RA1 |
| <b>IL21</b>  | IL21R   |
| <b>IL21</b>  | IL2RG   |
| <b>IL22</b>  | IL10RA  |
| <b>IL22</b>  | IL22RA1 |
| <b>IL22</b>  | IL22RA2 |
| <b>IL23A</b> | IL12RB1 |
| <b>IL23A</b> | IL23R   |
| <b>IL24</b>  | IL20RA  |
| <b>IL24</b>  | IL20RB  |
| <b>IL24</b>  | IL22RA1 |
| <b>IL25</b>  | IL17RB  |
| <b>IL2</b>   | IL2RA   |
| <b>IL2</b>   | IL2RB   |
| <b>IL2</b>   | IL2RG   |
| <b>IL31</b>  | IL31RA  |
| <b>IL31</b>  | OSMR    |
| <b>IL3</b>   | CSF2RB  |
| <b>IL3</b>   | IL3RA   |
| <b>IL4</b>   | IL13RA1 |
| <b>IL4</b>   | IL2RG   |
| <b>IL4</b>   | IL4R    |
| <b>IL5</b>   | CSF2RB  |
| <b>IL5</b>   | IL5RA   |
| <b>IL6</b>   | IL6R    |
| <b>IL6</b>   | IL6ST   |
| <b>IL7</b>   | IL2RG   |
| <b>IL7</b>   | IL7R    |
| <b>IL8</b>   | CXCR1   |
| <b>IL8</b>   | CXCR2   |
| <b>IL8</b>   | DARC    |

|               |         |
|---------------|---------|
| <b>IL9</b>    | IL2RG   |
| <b>IL9</b>    | IL9R    |
| <b>CCL11</b>  | ACKR4   |
| <b>CCL13</b>  | ACKR4   |
| <b>CCL14</b>  | CCR3    |
| <b>CCL16</b>  | CCR8    |
| <b>CCL17</b>  | DARC    |
| <b>CCL18</b>  | C14orf1 |
| <b>CCL19</b>  | ACKR2   |
| <b>CCL19</b>  | CCR10   |
| <b>CCL21</b>  | ACKR2   |
| <b>CCL25</b>  | ACKR2   |
| <b>CCL25</b>  | CCR10   |
| <b>CCL26</b>  | CCR1    |
| <b>CCL27</b>  | ACKR2   |
| <b>CCL28</b>  | ACKR2   |
| <b>CCL2</b>   | ACKR4   |
| <b>CCL2</b>   | CCR10   |
| <b>CCL3L1</b> | CCR1    |
| <b>CCL3L1</b> | CCR3    |
| <b>CCL3L1</b> | CCR5    |
| <b>CCL3L3</b> | ACKR2   |
| <b>CCL3L3</b> | CCR5    |
| <b>CCL3</b>   | ACKR2   |
| <b>CCL3</b>   | CCR3    |
| <b>CCL3</b>   | CCR4    |
| <b>CCL4</b>   | CCR3    |
| <b>CCL5</b>   | ACKR4   |
| <b>CCL5</b>   | SDC1    |
| <b>CCL5</b>   | SDC4    |
| <b>CCL7</b>   | ACKR4   |
| <b>CCL7</b>   | CCR10   |

|               |         |
|---------------|---------|
| <b>CCL7</b>   | DARC    |
| <b>CCL8</b>   | ACKR4   |
| <b>CCL8</b>   | DARC    |
| <b>CD14</b>   | ITGA4   |
| <b>CD14</b>   | ITGB1   |
| <b>CD55</b>   | CR1     |
| <b>CD5L</b>   | CD5     |
| <b>CXCL10</b> | SDC4    |
| <b>CXCL12</b> | CD4     |
| <b>CXCL12</b> | ITGB1   |
| <b>CXCL13</b> | ACKR4   |
| <b>CXCL13</b> | CCR10   |
| <b>CXCL13</b> | CXCR3   |
| <b>CXCL5</b>  | DARC    |
| <b>HLA-A</b>  | APLP2   |
| <b>HLA-A</b>  | ERBB2   |
| <b>HLA-A</b>  | KIR3DL1 |
| <b>HLA-A</b>  | LILRB1  |
| <b>HLA-A</b>  | LILRB2  |
| <b>HLA-B</b>  | CANX    |
| <b>HLA-B</b>  | KLRD1   |
| <b>HLA-B</b>  | LILRB1  |
| <b>HLA-B</b>  | LILRB2  |
| <b>HLA-C</b>  | LILRA3  |
| <b>HLA-C</b>  | LILRB1  |
| <b>HLA-C</b>  | LILRB2  |
| <b>HLA-G</b>  | LILRB2  |
| <b>IL12A</b>  | CD28    |
| <b>IL12B</b>  | IL23R   |
| <b>IL15</b>   | IL2RA   |
| <b>IL16</b>   | GRIN2C  |
| <b>IL16</b>   | GRIN2D  |

|                 |         |
|-----------------|---------|
| <b>IL16</b>     | KCNA3   |
| <b>IL16</b>     | KCND1   |
| <b>IL16</b>     | KCND2   |
| <b>IL16</b>     | KCNJ10  |
| <b>IL16</b>     | KCNJ15  |
| <b>IL16</b>     | KCNJ4   |
| <b>IL17A</b>    | IL17RC  |
| <b>IL17F</b>    | IL17RA  |
| <b>IL18</b>     | IL1RL2  |
| <b>IL1A</b>     | IL1RAP  |
| <b>IL1B</b>     | ADRB2   |
| <b>IL1F10</b>   | IL1R1   |
| <b>IL22</b>     | IL10RB  |
| <b>IL27</b>     | IL27RA  |
| <b>IL2</b>      | CD53    |
| <b>IL2</b>      | NGFR    |
| <b>IL34</b>     | CSF1R   |
| <b>IL4</b>      | CD53    |
| <b>IL4</b>      | IL13RA2 |
| <b>IL8</b>      | SDC1    |
| <b>IL8</b>      | SDC2    |
| <b>CD274</b>    | PDCD1   |
| <b>CD80</b>     | CTLA4   |
| <b>LGALS9</b>   | HAVCR2  |
| <b>PVR</b>      | TIGIT   |
| <b>HLA-DQA1</b> | LAG3    |
| <b>TNFRSF14</b> | BTLA    |
| <b>ADORA1</b>   | ADORA2A |
| <b>CD80</b>     | CD28    |
| <b>ICOSLG</b>   | ICOS    |
| <b>TNFSF9</b>   | TNFRSF9 |
| <b>TNFSF4</b>   | TNFRSF4 |

|                |          |
|----------------|----------|
| <b>TNFSF18</b> | TNFRSF18 |
| <b>CD47</b>    | SIRPA    |
| <b>CSF1</b>    | CSF1R    |



## Flow Repository Key- PBMC

## Supplemental Table 6

| FCS File                 | ID       | Disease State              |
|--------------------------|----------|----------------------------|
| 20191209_PBMC_CP.fcs     | 20191209 | Chronic Pancreatitis       |
| 20191219_PBMC_CP.fcs     | 20191219 | Chronic Pancreatitis       |
| 20191226_PBMC_CP.fcs     | 20191226 | Chronic Pancreatitis       |
| 20191228_PBMC_CP.fcs     | 20191228 | Chronic Pancreatitis       |
| 20191230_PBMC_CP.fcs     | 20191230 | Chronic Pancreatitis       |
| 20191237_PBMC_CP.fcs     | 20191237 | Chronic Pancreatitis       |
| 20191244_PBMC_CP.fcs     | 20191244 | Chronic Pancreatitis       |
| 20191249_PBMC_CP.fcs     | 20191249 | Chronic Pancreatitis       |
| 20191196_PBMC_H.fcs      | 20191196 | Duodenal Adenoma (Healthy) |
| 20191235_PBMC_DA.fcs     | 20191235 | Duodenal Adenoma (Healthy) |
| 8839995_H_PBMC.fcs       | 8839995  | Healthy                    |
| 8839996_PBMC_H.fcs       | 8839996  | Healthy                    |
| 8839999_H_PBMC_0.fcs     | 8839999  | Healthy                    |
| 20191194_PBMC_H.fcs      | 20191194 | Healthy                    |
| 20191195_PBMC_H.fcs      | 20191195 | Healthy                    |
| 20191203_PBMC_H.fcs      | 20191203 | Healthy                    |
| 20191205_PBMC_H.fcs      | 20191205 | Healthy                    |
| 20191206_PBMC_H.fcs      | 20191206 | Healthy                    |
| 20191211_PBMC_H.fcs      | 20191211 | Healthy                    |
| 20191212_PBMC_H.fcs      | 20191212 | Healthy                    |
| 20191232_PBMC_H.fcs      | 20191232 | Healthy                    |
| 20191233_PBMC_H.fcs      | 20191233 | Healthy                    |
| 20191234_PBMC_H.fcs      | 20191234 | Healthy                    |
| 20191236_PBMC_CP.fcs     | 20191236 | Healthy                    |
| 20191247_PBMC_CP.fcs     | 20191247 | Healthy                    |
| 20191257_PBMC_H.fcs      | 20191257 | Healthy                    |
| 20160882_PBMC_PDAC.fcs   | 20160882 | PDAC                       |
| 20160882_PBMct2_PDAC.fcs | 20160882 | PDAC                       |
| 20160897_PBMC_PDAC.fcs   | 20160897 | PDAC                       |
| 20171027_PBMC_PDAC.fcs   | 20171027 | PDAC                       |
| 20171040_PBMC_PDAC.fcs   | 20171040 | PDAC                       |
| 20171064_PBMC_PDAC.fcs   | 20171064 | PDAC                       |
| 20171085_PBMC_PDAC.fcs   | 20171085 | PDAC                       |
| 20181107_PBMC_PDAC.fcs   | 20181107 | PDAC                       |
| 20181121_PBMC_PDAC.fcs   | 20181121 | PDAC                       |
| 20181129_PBMC_PDAC.fcs   | 20181129 | PDAC                       |
| 20181157_PBMC_PDAC.fcs   | 20181157 | PDAC                       |
| 20191172_PBMC_PDAC.fcs   | 20191172 | PDAC                       |
| 20191176_PBMct1_PDAC.fcs | 20191176 | PDAC                       |
| 20191176_PBMct2_PDAC.fcs | 20191176 | PDAC                       |
| 20191180_PBMC_PDAC.fcs   | 20191180 | PDAC                       |
| 20191198_PBMC_PDAC.fcs   | 20191198 | PDAC                       |
| 20191201_PBMC_PDAC.fcs   | 20191201 | PDAC                       |
| 20191202_PBMC_PDAC.fcs   | 20191202 | PDAC                       |
| 20191204_PBMC_PDAC.fcs   | 20191204 | PDAC                       |
| 20191207_PBMC_PDAC.fcs   | 20191207 | PDAC                       |
| 20191210_PBMC_PDAC.fcs   | 20191210 | PDAC                       |

Flow Repository Key- PBMC

Supplemental Table 6

|                           |                 |      |
|---------------------------|-----------------|------|
| 20191214_PBMC_PDAC.fcs    | 20191214        | PDAC |
| 20191215_PBMC_PDAC.fcs    | 20191215        | PDAC |
| 20191216_PBMC_PDAC.fcs    | 20191216        | PDAC |
| 20191221_PBMC_PDAC.fcs    | 20191221        | PDAC |
| 20191222_PBMC_PDAC.fcs    | 20191222        | PDAC |
| 20191222_PBMct2_PDAC.fcs  | 20191222        | PDAC |
| 20191229_PBMC_T2_PDAC.fcs | 20191229t2      | PDAC |
| 20191243_PBMC_PDAC.fcs    | 20191243        | PDAC |
| 20191245_PBMC_PDAC.fcs    | 20191245        | PDAC |
| 20191246_PBMct1_PDAC.fcs  | 20191246        | PDAC |
| 61353210_PBMC_PDAC.fcs    | 61353210        | PDAC |
| 61354860_PBMC_PDAC.fcs    | 61354860        | PDAC |
| 20191229_PBMC_PDAC.fcs    | 20191229 (6750) | PDAC |
| 20191238_PBMct1_PDAC.fcs  | 20191238t1      | PDAC |
| 20191238_PBMct2_PDAC.fcs  | 20191238t2      | PDAC |

Flow Repository Key- Tissue

Supplemental Table 6

| FCS filename                        | ID         | Tissue Type     |
|-------------------------------------|------------|-----------------|
| 19_561_ADJ_N_PANC.fcs               | 19-561     | Adjacent Normal |
| 19_700_ADJ_N_PANC.fcs               | 19-700     | Adjacent Normal |
| 19_732_ADJ_N_PANC.fcs               | 19-732     | Adjacent Normal |
| DS20191172_Tissue_PancNAdj_PDA.fcs  | DS20191172 | Adjacent Normal |
| DS20191196_Tissue_PancNAdj_DA.fcs   | DS20191196 | Adjacent Normal |
| DS20191252_ADJ_N_PANC.fcs           | DS20191252 | Adjacent Normal |
| DS20191258_ADJ_N_PANC.fcs           | DS20191258 | Adjacent Normal |
| 19-262_ADJ_N_PANC.fcs               | 19-262     | Adjacent Normal |
| 19_262_Tissue_Tumor_PDA.fcs         | 19-262     | Tumor           |
| 19_364_Tissue_Tumor_PDA.fcs         | 19-364     | Tumor           |
| DS20191253_Tissue_Tumor_PDA.fcs     | DS20191253 | Tumor           |
| 6135_3210_Tissue_Tumor_PDA.fcs      | 61353210   | Tumor           |
| DS20181107_Tissue_Tumor_PDA_MCN.fcs | DS20181107 | Tumor           |
| DS20191225_Tissue_Tumor_PDA.fcs     | DS20191225 | Tumor           |
| DS20191229_Tissue_Tumor_PDA.fcs     | DS20191229 | Tumor           |
| DS20191240_Tissue_Tumor.fcs         | DS20191240 | Tumor           |
| DS20191252_Tissue_Tumor_PDA.fcs     | DS20191252 | Tumor           |
| DS20191262_Tissue_Tumor_PDA.fcs     | DS20191262 | Tumor           |
| DS20191296_Tissue_Tumor_PDA.fcs     | DS20191296 | Tumor           |
